# Supplementary material
Source: Springer Nature journal article supplement (https://www.springermedizin.de/resource/supplementary/12906_2011_1039_MOESM3_ESM.pdf/9520304)

**A****Plasma lipase activity****(U/L)**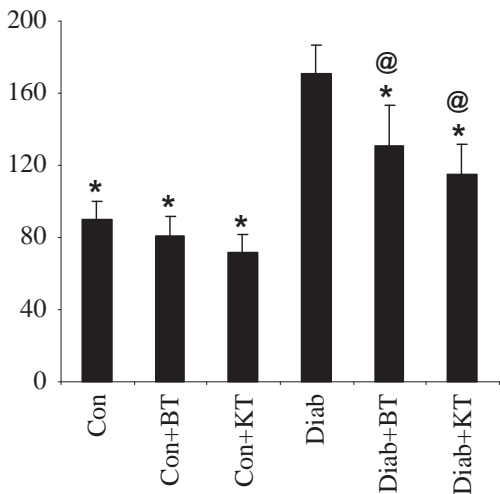**B****Pancreas lipase activity****(U/mg protein)**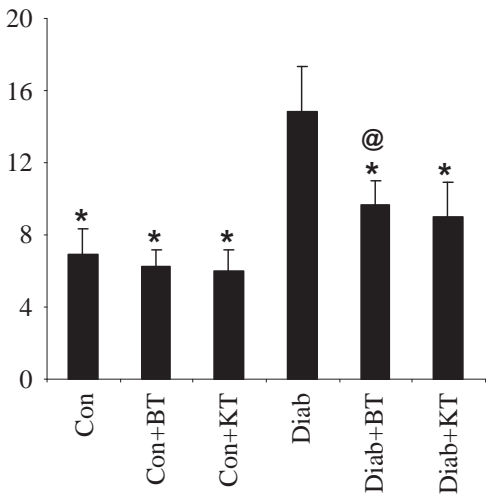

Supplement: MOESM3 [file 9520304]
